# Supplementary material
Source: PubMed Central journal article supplement (PMC3425335)
Supplement: chest_142_2_320_ds01.pdf [file chest_142_2_320_ds01.pdf]

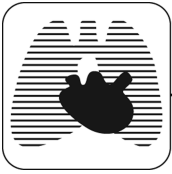

## **ADRB2 Polymorphisms and Budesonide/Formoterol Responses in COPD**

*Eugene R. Bleecker, MD, FCCP; Deborah A. Meyers, PhD;  
William C. Bailey, MD, FCCP; Anne-Marie Sims, PhD; Sarah R. Bujac, MSc;  
Mitch Goldman, MD, PhD; and Ubaldo J. Martin, MD*

### **e-Appendix 1.**

#### **Abbreviations**

*ADRB2* =  $\beta_2$ -adrenergic receptor gene  
ANCOVA = analysis of covariance  
BCSS = Breathless Cough and Sputum Scale  
BUD = budesonide  
CI = confidence interval  
COPD = chronic obstructive pulmonary disease  
DPI = dry powder inhaler  
FEV<sub>1</sub> = forced expiratory volume in 1 second  
FM = formoterol  
PBO = placebo  
PCR = polymerase chain reaction  
PEF = peak expiratory flow  
pMDI = pressurized metered-dose inhaler  
SABA = short-acting  $\beta_2$ -adrenergic agonist.  
SGRQ = St. George's Respiratory Questionnaire  
SNP = single-nucleotide polymorphism

#### **METHODS**

##### *Coprimary End Points*

The coprimary clinical end points were predose forced expiratory volume in 1 second (FEV<sub>1</sub>) and 1-hour postdose FEV<sub>1</sub>.<sup>1,2</sup> Spirometry was performed according to American Thoracic Society recommendations<sup>3</sup> at approximately the same time ( $\pm 1$  hour) in the morning at each clinic visit, approximately 12 hours after the previous dose of study medication. The patient was to refrain from the use of rescue medication for at least 6 hours and ipratropium for at least 8 hours before the clinic visit.<sup>1,2</sup>

*Online supplements are not copyedited prior to posting.*



### *Secondary End Points*

A chronic obstructive pulmonary disease (COPD) exacerbation was defined as a worsening of COPD that resulted in treatment with an oral corticosteroid or hospitalization.<sup>1,2</sup> Dyspnea was assessed daily using the validated Breathlessness Diary, which is a single-item measure from the Breathless Cough and Sputum Scale (BCSS) score. The BCSS is a patient-reported outcome for which patients record severity of breathlessness, cough, and sputum in a daily diary before the evening dose of study medication. Each symptom is rated using a 5-point Likert-type scale from 0 to 4, with higher score indicating greater symptom severity. The total score is the sum of the three symptom scores.<sup>4</sup>

Health status was assessed at Months 1, 2, 6, and 12 (Trial I only) during clinic visits using the self-administered St. George's Respiratory Questionnaire (SGRQ).<sup>1,2,5</sup> The SGRQ is a 76-item tool that assesses health status in three areas; symptoms, activities (causing or limited by breathlessness), and impact on daily life. Each section is scored separately on a scale of 0 to 100, with 0 indicating no impairment in quality of life. Total score is based on responses to all items and is calculated using weights attached to each item in the questionnaire.<sup>5</sup> Morning and evening peak expiratory flow (PEF), nighttime awakenings, and rescue medication use were recorded daily in patients' diaries. Nighttime awakenings were assessed on a scale from 0 to 4, with higher scores indicating greater sleep disturbance.

***Sequencing for genotyping.*** Taqman genotyping of 11  $\beta_2$ -adrenergic receptor gene (*ADRB2*) single-nucleotide polymorphism (SNP) in Studies I and II was verified by direct sequencing in one of eight 384-well sample plates across 3 *ADRB2* coding SNPs: Cys-19Arg, Gly16Arg, and Gln27Glu. The *ADRB2* genomic sequence was exported from online databases. Primers (e-Table 1) were designed to cover the 3-SNP Cys-19Arg\_Gly16Arg\_Gln27Glu sequence. Primers were tested in CEPH DNA, in 384 well plates using the reagents in e-Table 2.

*Online supplements are not copyedited prior to posting.*



PCR was carried out under the following conditions: 95°C 10 min, followed by 40 cycles at 94°C 30 sec, 55°C 30 sec, 72°C 1 min, with a final extension of 72°C 10 min. The primers amplified well under these conditions and were carried forward to the 337 study samples. Sequencing was carried out by Sanger methodology<sup>6</sup> on an ABI3770. 100% concordance with TaqMan methodology was shown, giving confidence in the full TaqMan dataset to be used in further analysis.

**Haplotype construction.** Haplotype construction was performed using the combined de-identified genetic datasets from studies I and II. The imputation was performed for white patients only because low patient numbers in other racial groups precluded accurate prediction of haplotypes in these populations.

The E-M algorithm, as implemented in SNPHAP, was used to estimate frequencies for the 11-SNP haplotype, which were used to impute an 11-SNP haplotype pair for each patient. The 11-SNP haplotype pairs were collapsed to form the 3-SNP haplotype pairs across Cys-19Arg, Gly16Arg, and Gln27Glu. White patients with more than four missing genotypes and those predicted to carry rare haplotypes (< 5% population frequency) were not allocated a haplotype pair and were excluded from downstream haplotype pair analyses.



### *Statistical Analyses*

All pharmacogenetic analyses were conducted for the Gly16Arg (rs1042713) SNP. Gly16Arg was analyzed as a categorical variable with three levels, one for each possible genotype. The 11 SNPs (rs11958940, rs17778257, rs2895795, rs2053044, rs12654778, rs11959427, rs1042711, rs1042713, rs1042714, rs1800888, rs1042718) were used to infer 3-SNP haplotype pairs Cys-19Arg\_Gly16Arg\_Gln27Glu (rs1042711\_rs1042713\_rs1042714), which also were analyzed as categorical variables. Haplotype prediction was carried out independently from, and before, data analysis.

Changes in predose and postdose FEV<sub>1</sub>, exacerbations, diary variables, and SGRQ total score were compared from baseline to the average during the treatment period (with no imputation for missing data) using analysis of covariance models, including the effects of treatment, baseline value, country, genotype/haplotype, and genotype/haplotype-by-treatment interaction. For FEV<sub>1</sub> and SGRQ, baseline was defined as the last available value measured before the first dose of randomized treatment. For diary-related end points, including PEF, dyspnea, BCSS total score, nighttime awakenings, and rescue medication use, baseline was defined as the mean of the last 10 days of the run-in period, excluding study day 1.

*Online supplements are not copyedited prior to posting.*



### REFERENCES

1. Tashkin DP, Rennard SI, Martin P, et al. Efficacy and safety of budesonide and formoterol in one pressurized metered-dose inhaler in patients with moderate to very severe chronic obstructive pulmonary disease. Results of a 6-month randomized clinical trial. *Drugs*. 2008;68(14):1975-2000.
2. Rennard SI, Tashkin DP, McElhattan J, et al. Efficacy and tolerability of budesonide/formoterol in one hydrofluoroalkane pressurized metered-dose inhaler in patients with chronic obstructive pulmonary disease. Results from a 1-year randomized controlled clinical trial. *Drugs*. [javascript:AL\\_get\(this, 'jour', 'Drugs.'\);](#)2009;69(5):549-565.
3. American Thoracic Society. Medical section of the American Lung Association. Standardization of spirometry, 1994 update. *Am J Respir Crit Care Med*. 1995;152(3):1107-1136.
4. Leidy NK, Schmier JK, Jones MKC, Lloyd J, Rocchiccioli K. Evaluating symptoms in chronic obstructive pulmonary disease: validation of the Breathlessness, Cough and Sputum Scale<sup>®</sup>. *Respir Med*. 2003;97(suppl. A):S59-S70.
5. Jones PW, Quirk FH, Baveystock CM, Littlejohns P. A self-complete measure of health status for chronic airflow limitation. The St. George's Respiratory Questionnaire. *Am Rev Respir Dis*. 1992;145(6):1321-1327.
6. Sanger F, Nicklen S, Coulson AR. DNA sequencing with chain-terminating inhibitors. *Proc Natl Acad Sci. USA* 1977;74(12):5463-5467.

*Online supplements are not copyedited prior to posting.*



### e-Tables for Methods section

**e-Table 1—ADRB2 Primers**

|         | Primer Sequence (M13 tag in capitals)    |
|---------|------------------------------------------|
| Forward | ACTGTAAAACGACGGCCAGTgacaagctgagtgtgcagga |
| Reverse | ACCAGGAAACAGCTATGACCccagaagttgcaaaagtcc  |

**e-Table 2—PCR Reagents**

| Reagent                     | Stock Concentration | Final Concentration | X1 Volume (μl) |
|-----------------------------|---------------------|---------------------|----------------|
| Reddymix (2mM) <sup>a</sup> |                     |                     | 11             |
| Primer Mix                  | 2.5 μM each         | 200 μM each         | 1.0            |
| DNA                         | 25 ng/μl            | 1 ng/μl             | 1.0            |

<sup>a</sup>Supplied by Thermo Fisher Scientific, Inc.

PCR = polymerase chain reaction.

*Online supplements are not copyedited prior to posting.*



## RESULTS

**e-Table 3—ADRB2 Gly16Arg Genotype-by-Treatment Interactions for Primary and Secondary End Points**

| Variable                       | P Value (ANCOVA) |          |
|--------------------------------|------------------|----------|
|                                | Study I          | Study II |
| Predose FEV <sub>1</sub> , L   | 0.674            | 0.197    |
| Postdose FEV <sub>1</sub> , L  | 0.414            | 0.125    |
| Morning PEF                    | 0.752            | 0.312    |
| Evening PEF                    | 0.900            | 0.201    |
| Dyspnea                        | 0.652            | 0.133    |
| Rescue medication use, puffs/d | 0.775            | 0.428    |
| BCSS                           | 0.378            | 0.279    |
| SGRQ                           | 0.909            | 0.648    |

ANCOVA = analysis of covariance; BCSS = Breathlessness, Cough, and Sputum Scale; FEV<sub>1</sub> = forced expiratory volume in 1 second = PEF, peak expiratory flow; SGRQ, St. George's Respiratory Questionnaire.

**e-Table 4—ADRB2 Cys-19Arg\_Gly16Arg\_Gln27Glu Haplotype Pair-by-Treatment Interactions for Primary and Secondary End Points**

| Variable                       | P Value (ANCOVA) |          |
|--------------------------------|------------------|----------|
|                                | Study I          | Study II |
| Predose FEV <sub>1</sub> , L   | 0.212            | 0.307    |
| Postdose FEV <sub>1</sub> , L  | 0.368            | 0.170    |
| Morning PEF                    | 0.776            | 0.081    |
| Evening PEF                    | 0.513            | 0.072    |
| Dyspnea                        | 0.979            | 0.098    |
| Rescue medication use, puffs/d | 0.379            | 0.929    |
| BCSS                           | 0.869            | 0.304    |
| SGRQ                           | 0.562            | 0.386    |

ANCOVA = analysis of covariance; BCSS = Breathlessness, Cough, and Sputum Scale; FEV<sub>1</sub> = forced expiratory volume in 1 second = PEF, peak expiratory flow; SGRQ, St. George's Respiratory Questionnaire.

*Online supplements are not copyedited prior to posting.*



### FIGURE LEGENDS

**e-FIGURE 1.** Number of exacerbations requiring hospitalizations per patient–treatment year by *ADRB2* Gly16Arg genotype in Study I (A) and Study II (B).

BUD = budesonide; DPI = dry powder inhaler; FM = formoterol; PBO = placebo; pMDI = pressurized metered-dose inhaler.

**e-FIGURE 2.** Adjusted mean change from baseline (95% CI) in SGRQ score by *ADRB2* Gly16Arg genotype in Study I (A) and Study II (B).

BUD = budesonide; CI = confidence interval; DPI = dry powder inhaler; FM = formoterol; PBO = placebo; pMDI = pressurized metered-dose inhaler; SGRQ = St. George's Respiratory Questionnaire.

**e-FIGURE 3.** Adjusted mean change from baseline (95% CI) in predose FEV<sub>1</sub> by *ADRB2* Gly16Arg genotype for patients reversible and nonreversible to albuterol at baseline in Study I (A) and Study II (B).

BUD = budesonide; CI = confidence interval; DPI = dry powder inhaler; FEV<sub>1</sub> = forced expiratory volume in 1 second; FM = formoterol; PBO = placebo; pMDI = pressurized metered-dose inhaler.

**e-FIGURE 4.** Adjusted mean change from baseline (95% CI) in postdose FEV<sub>1</sub> by *ADRB2* Gly16Arg genotype for patients reversible and nonreversible to SABA at baseline in Study I (A) and Study II (B).

BUD = budesonide; CI = confidence interval; DPI = dry powder inhaler; FEV<sub>1</sub> = forced expiratory volume in 1 second; FM = formoterol; PBO = placebo; pMDI = pressurized metered-dose inhaler; SABA = short-acting  $\beta_2$ -adrenergic agonist.

*Online supplements are not copyedited prior to posting.*





e-Table 1A.

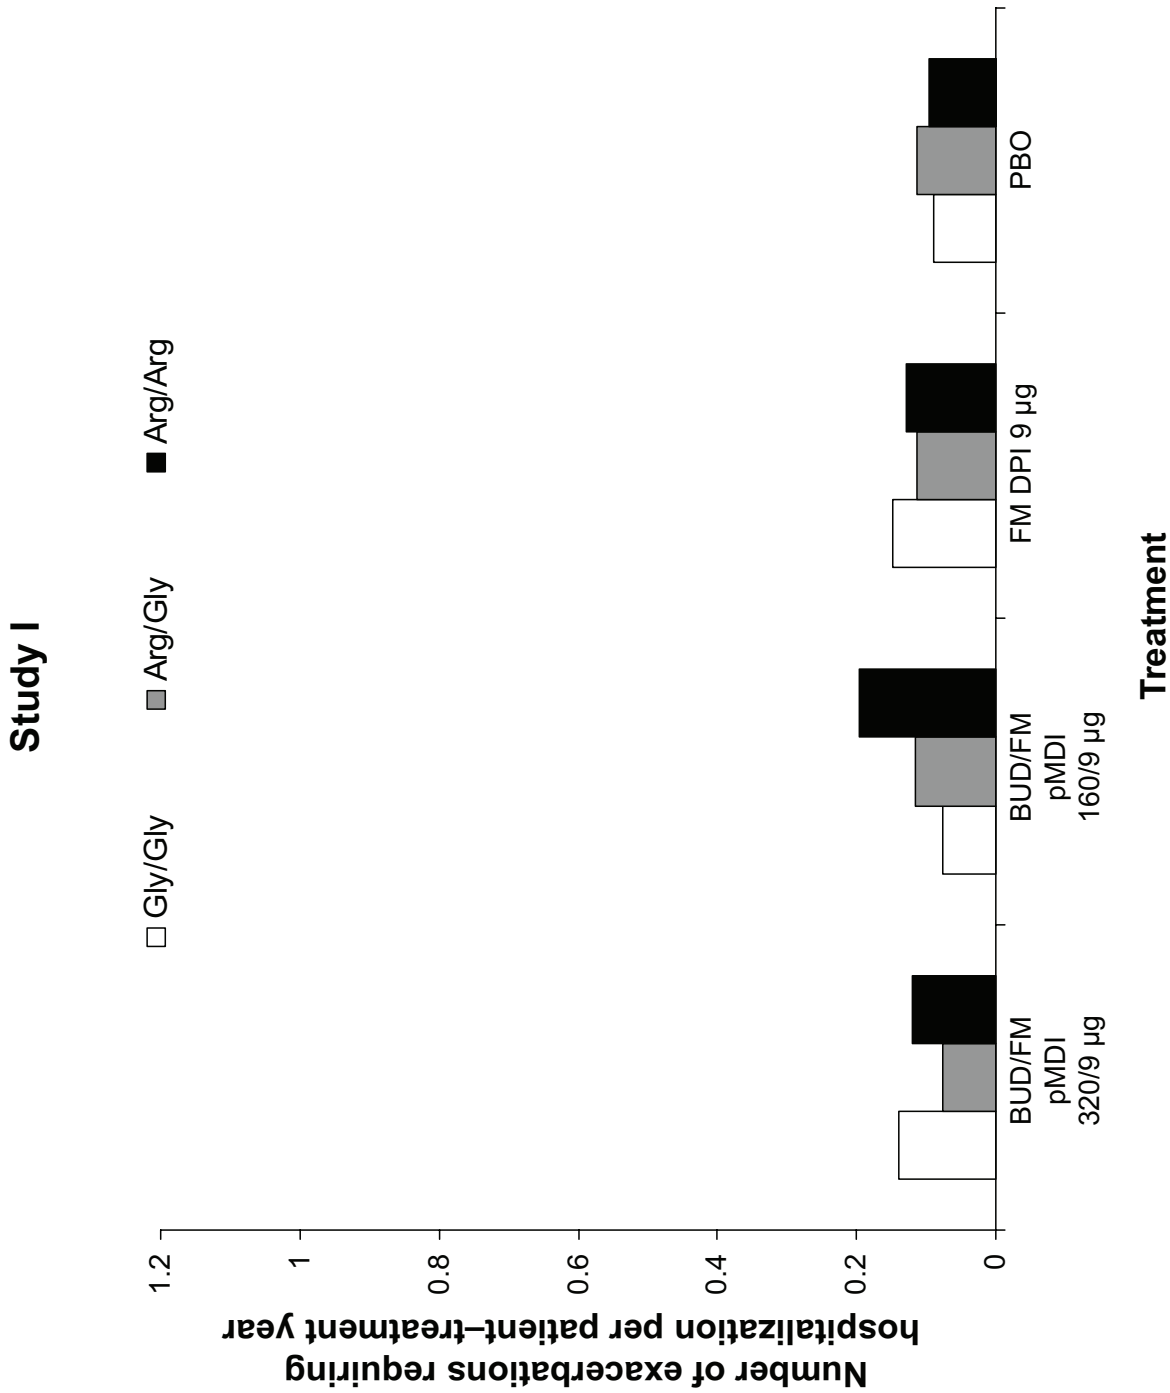

*Online supplements are not copyedited prior to posting.*



e-Table 1B.

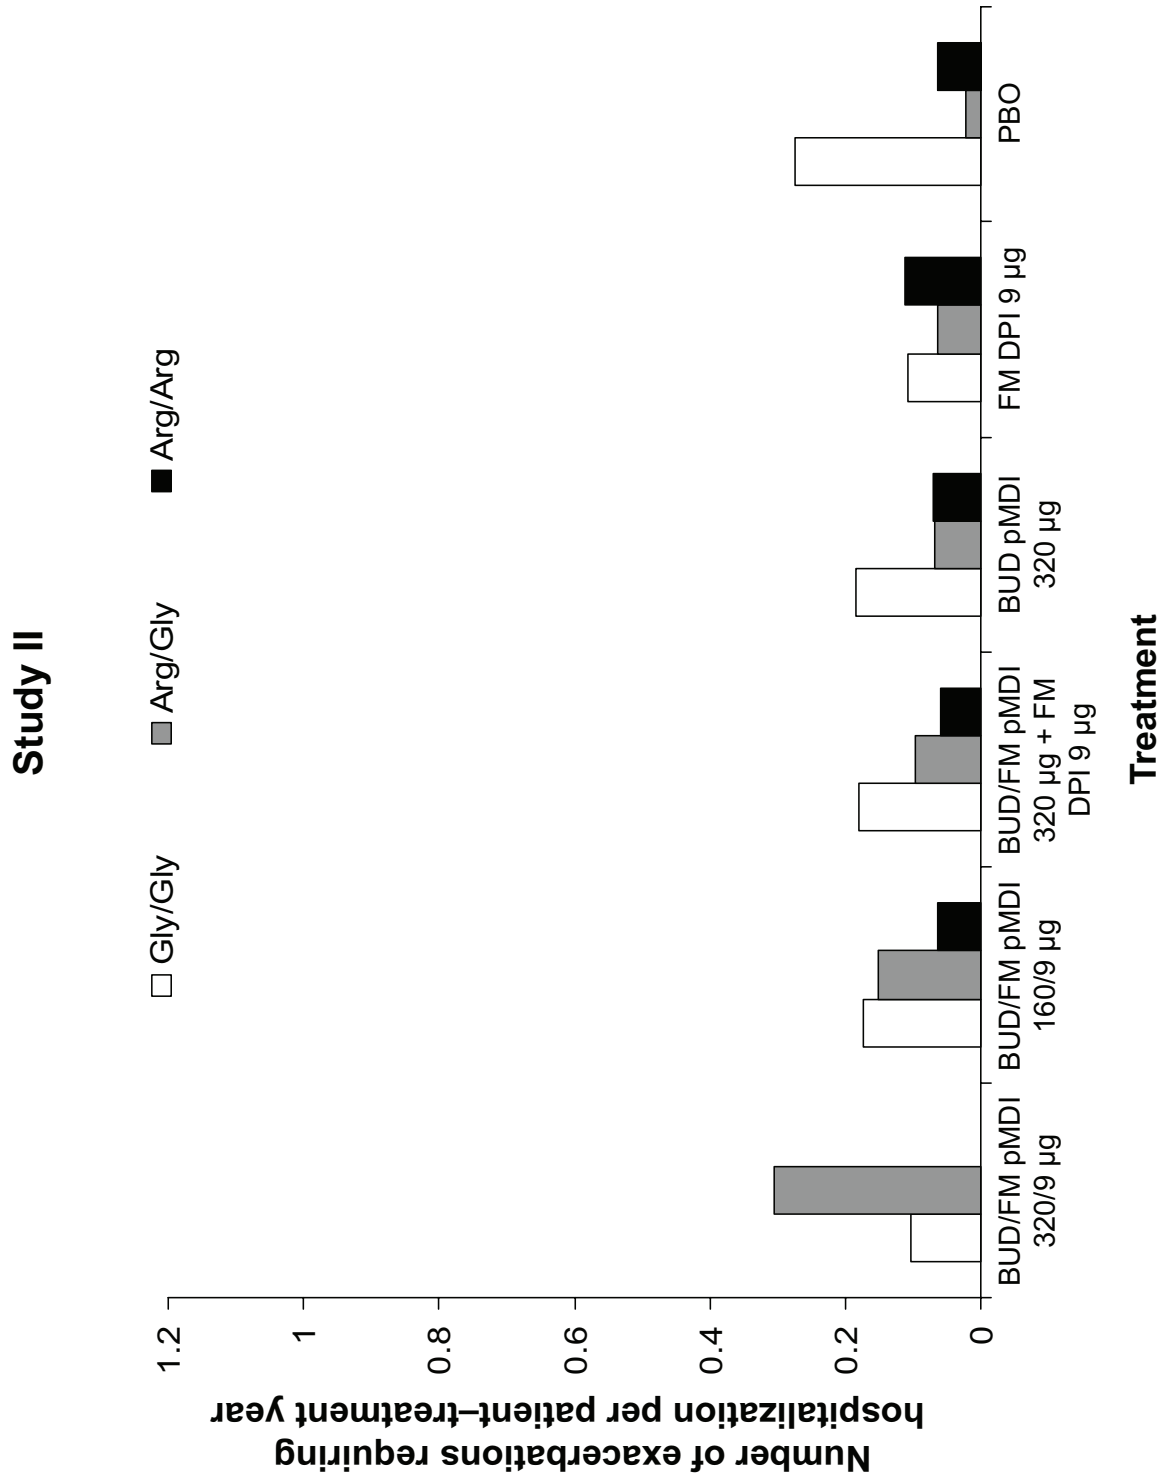

Online supplements are not copyedited prior to posting.



e-Table 2A.

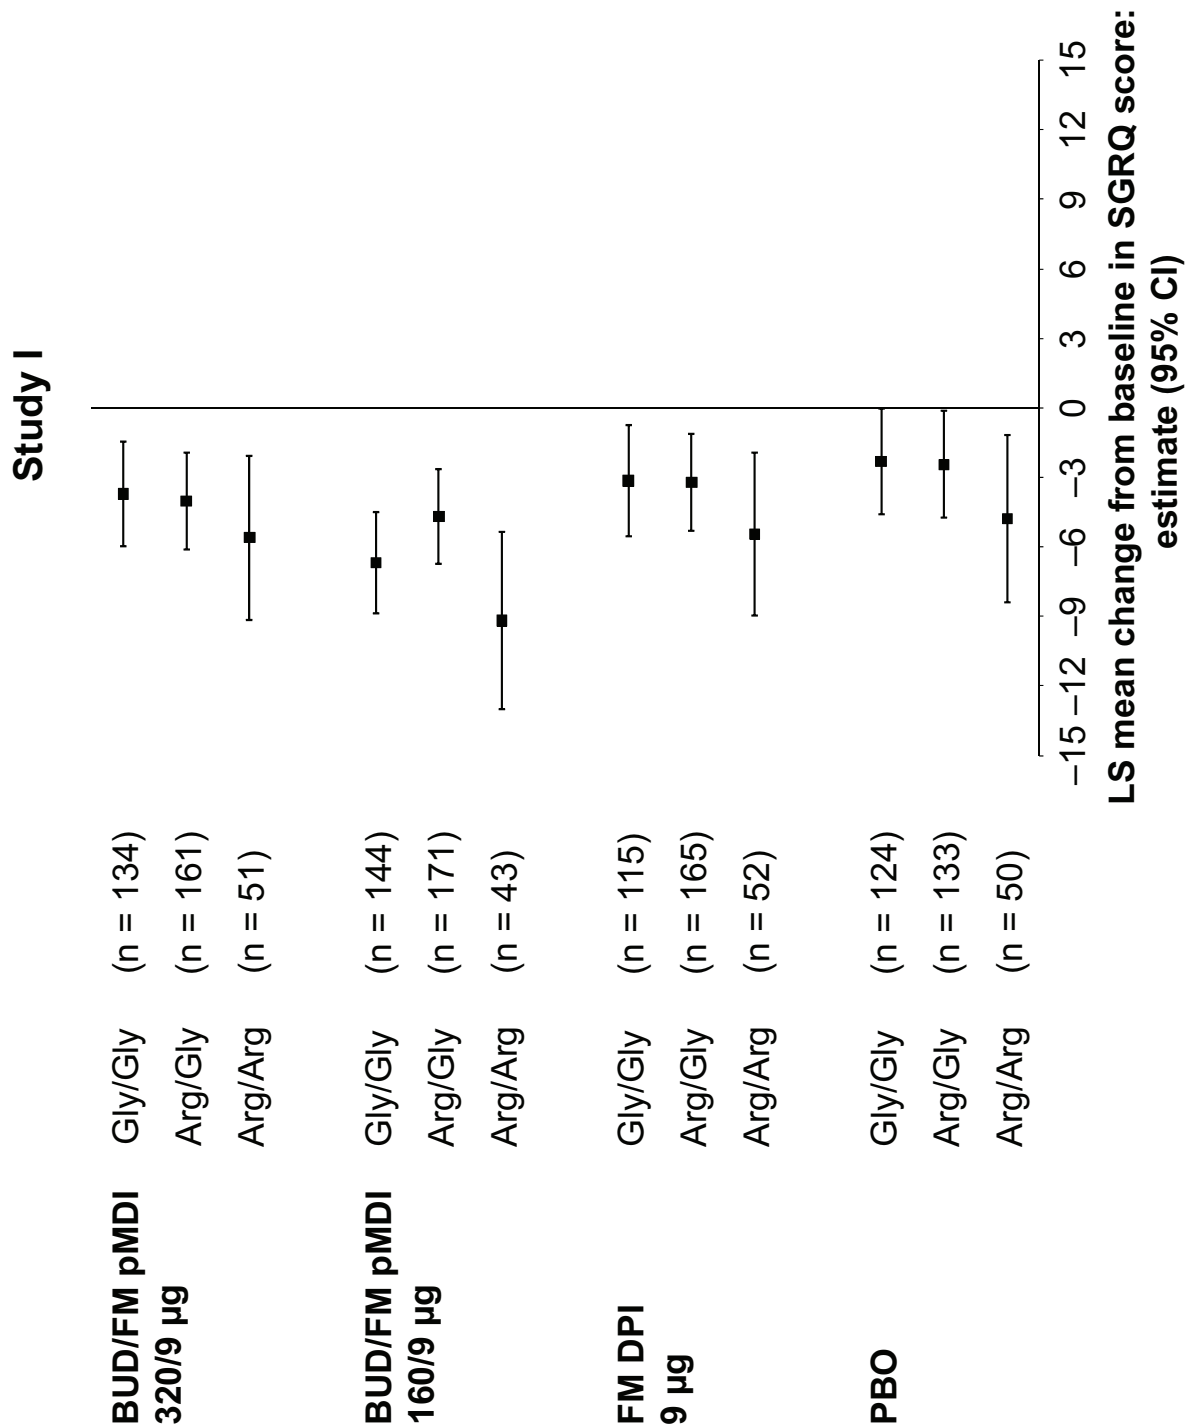

Online supplements are not copyedited prior to posting.



e-Table 2B.

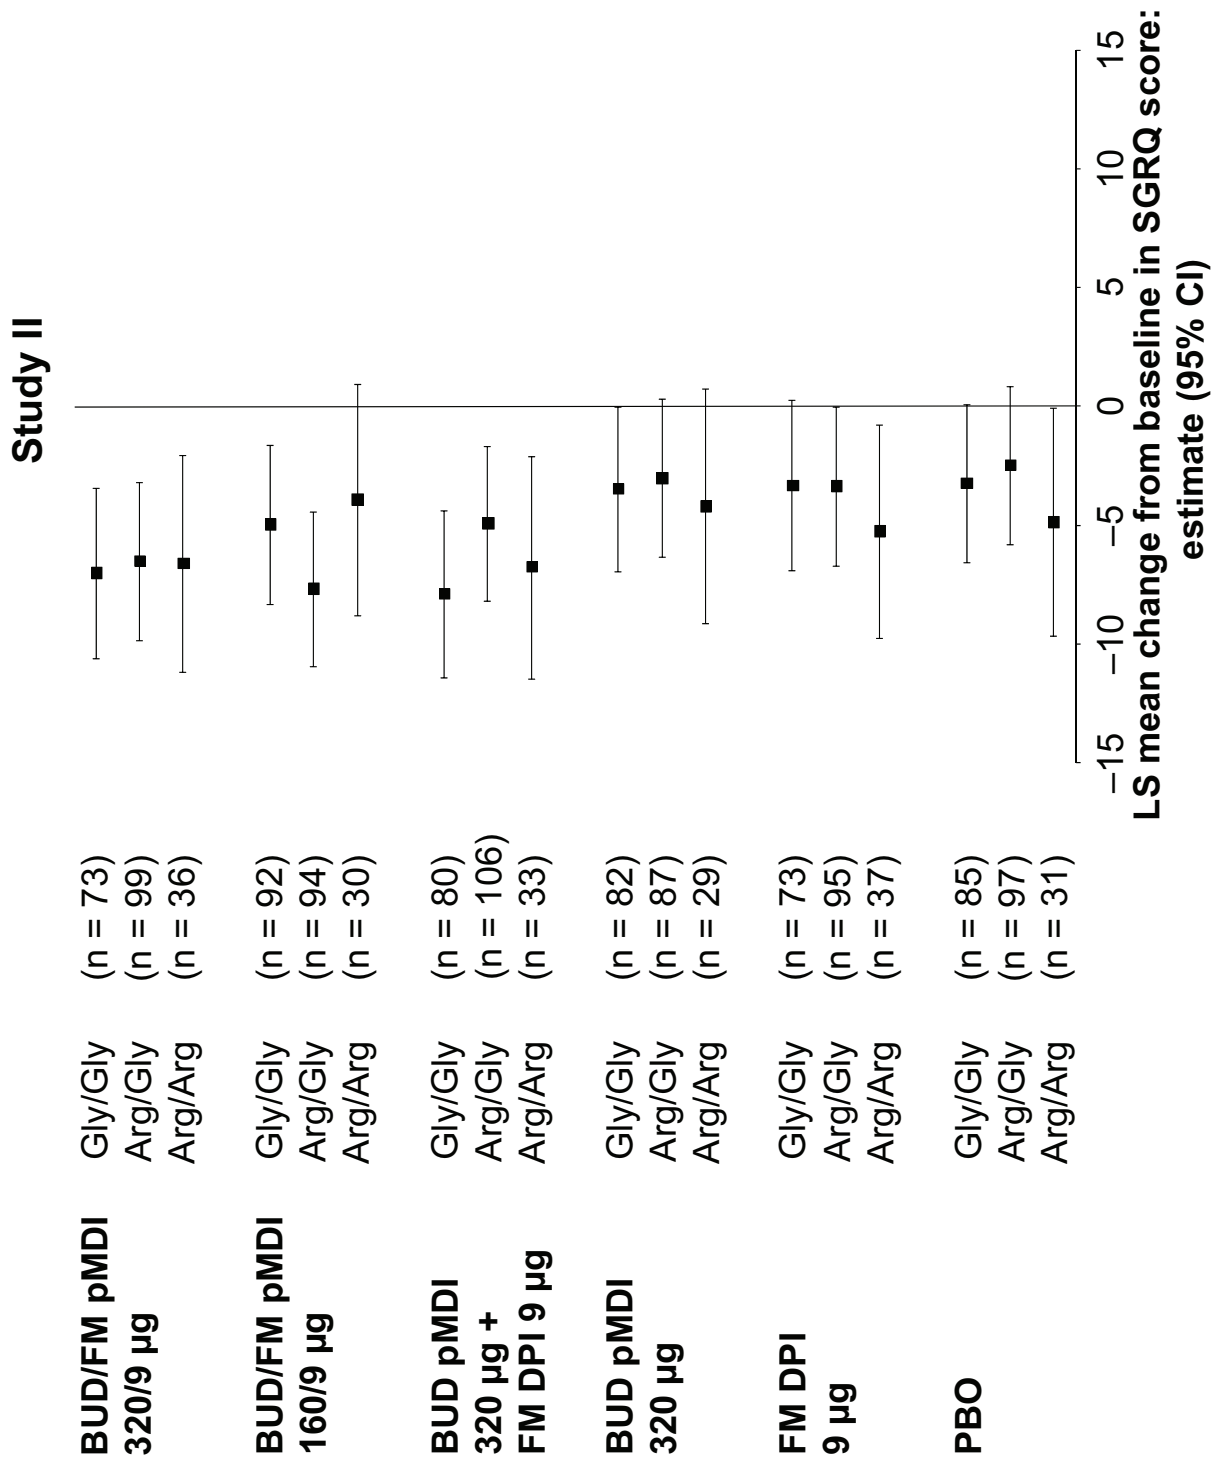

Online supplements are not copyedited prior to posting.



e-Table 3A.

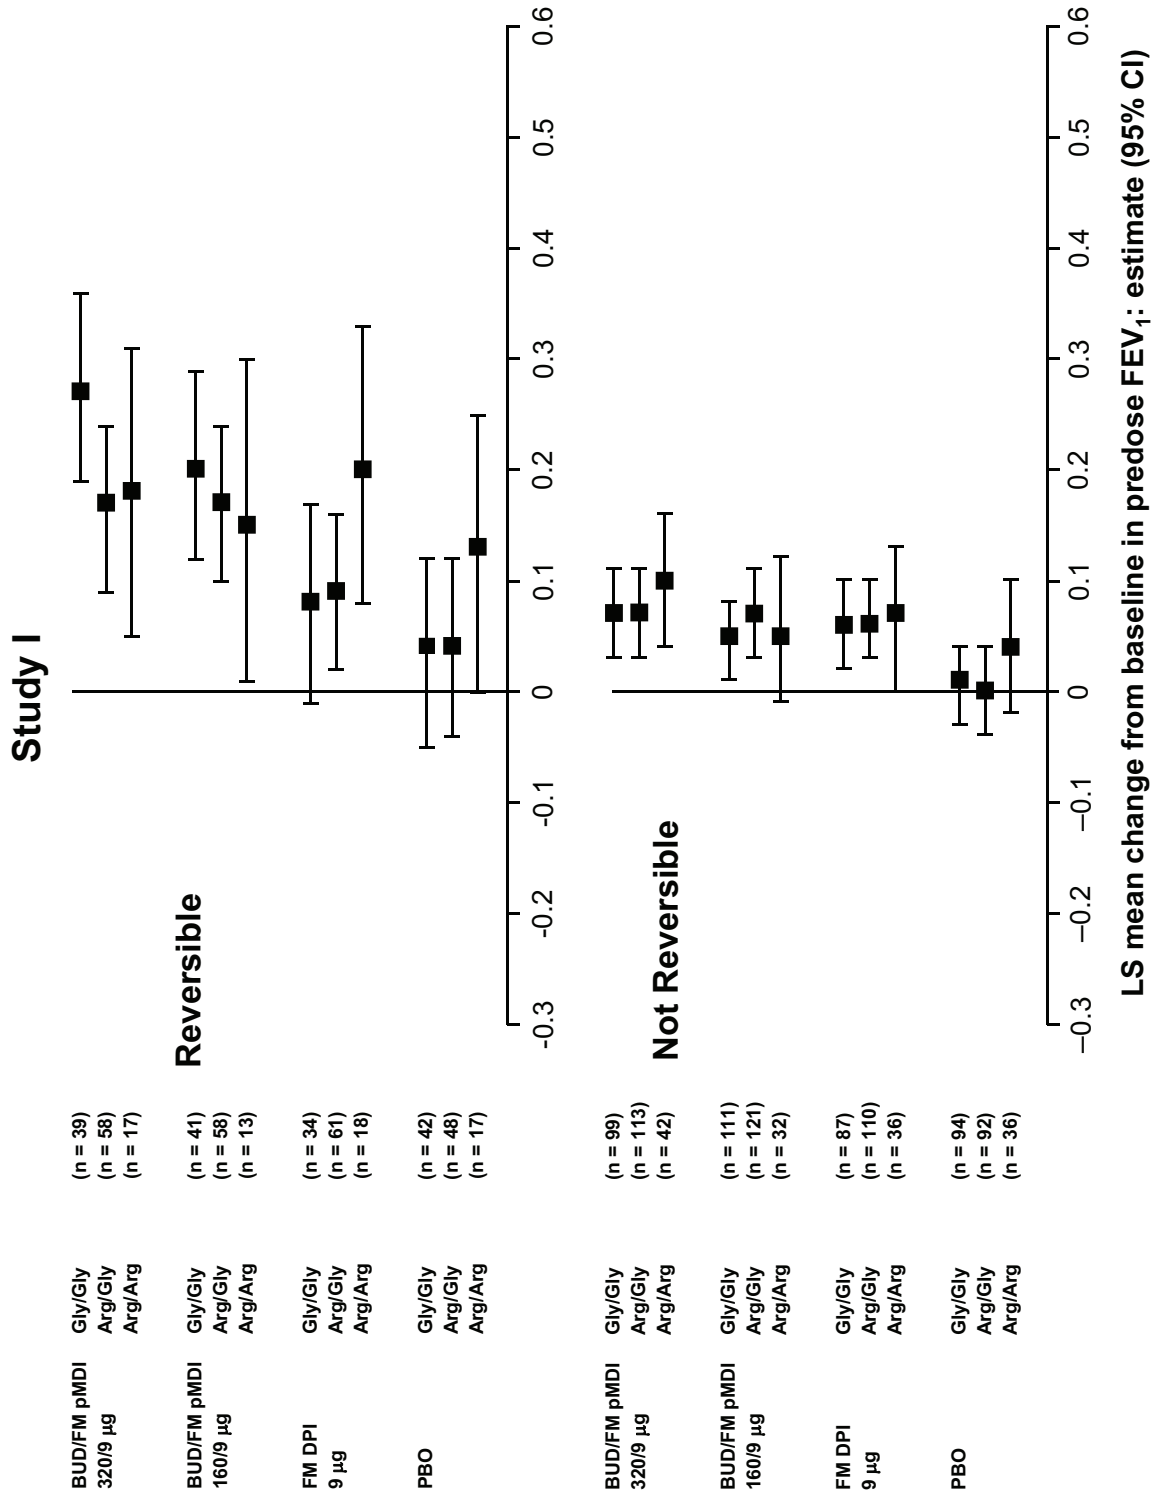

Online supplements are not copyedited prior to posting.



e-Table 3B.

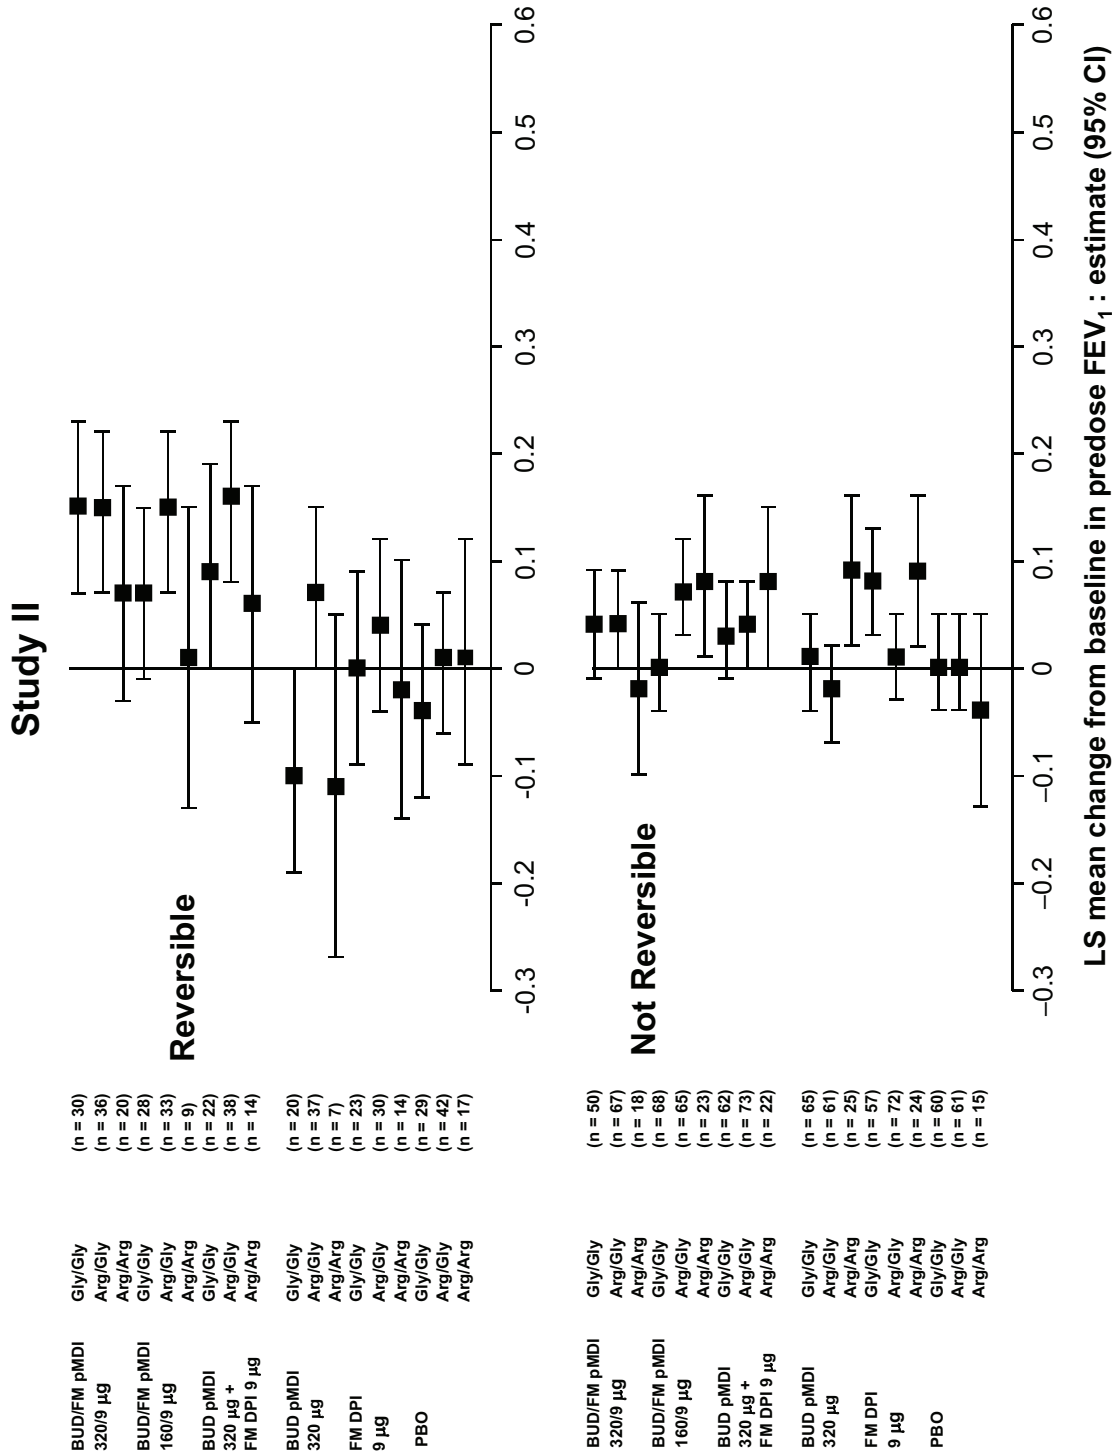

Online supplements are not copyedited prior to posting.



e-Table 4A.

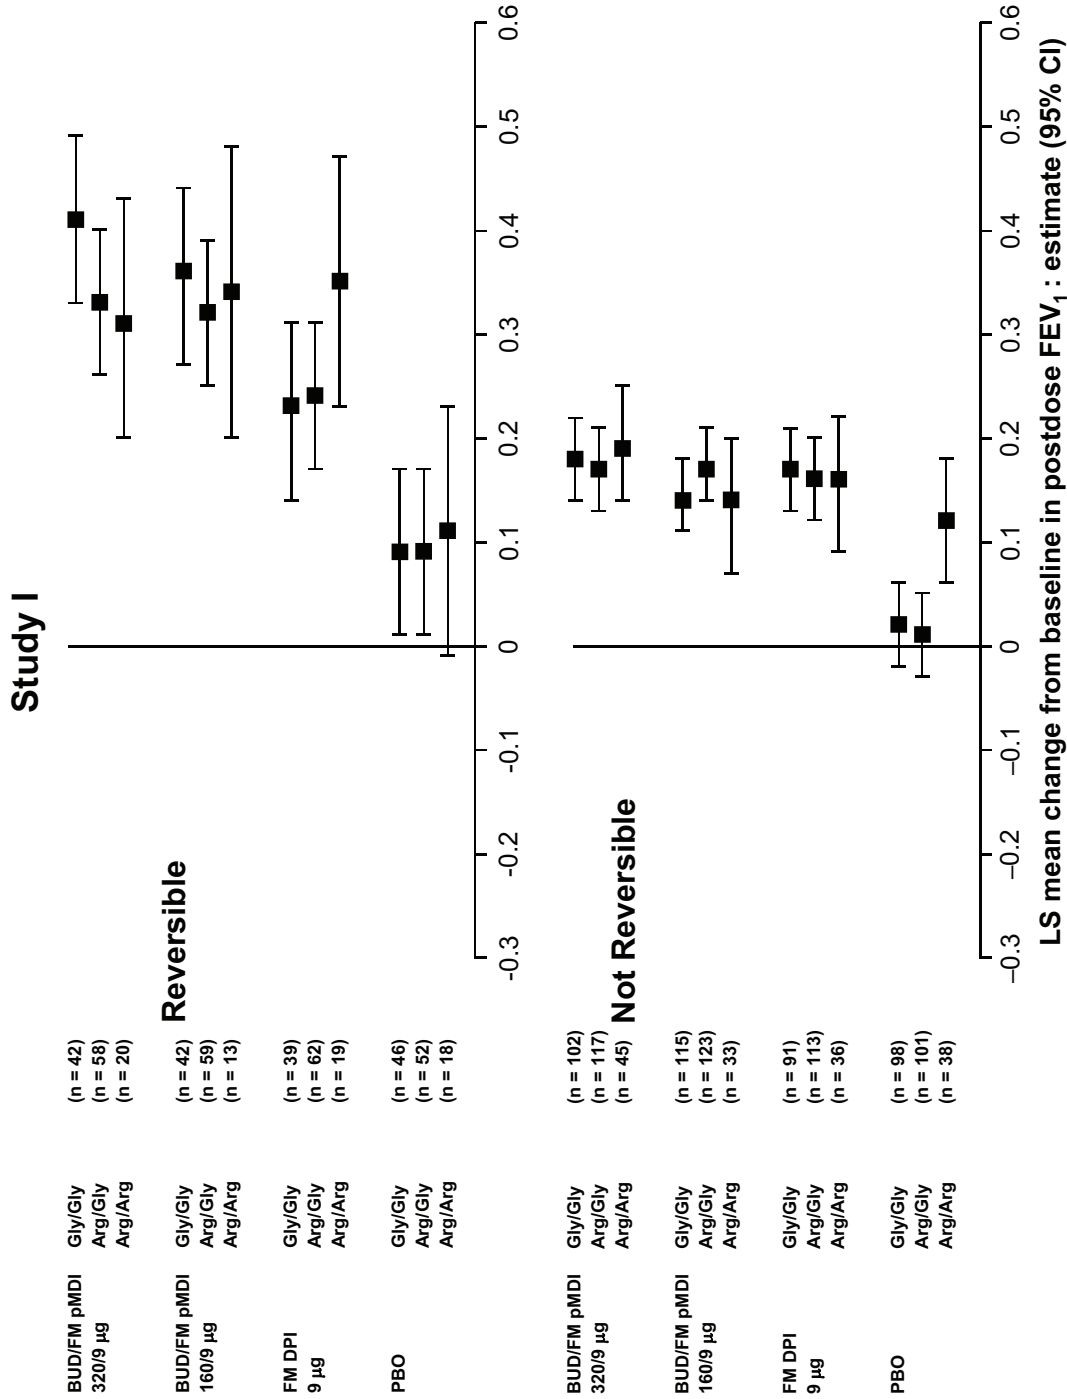

Online supplements are not copyedited prior to posting.



e-Table 4B.

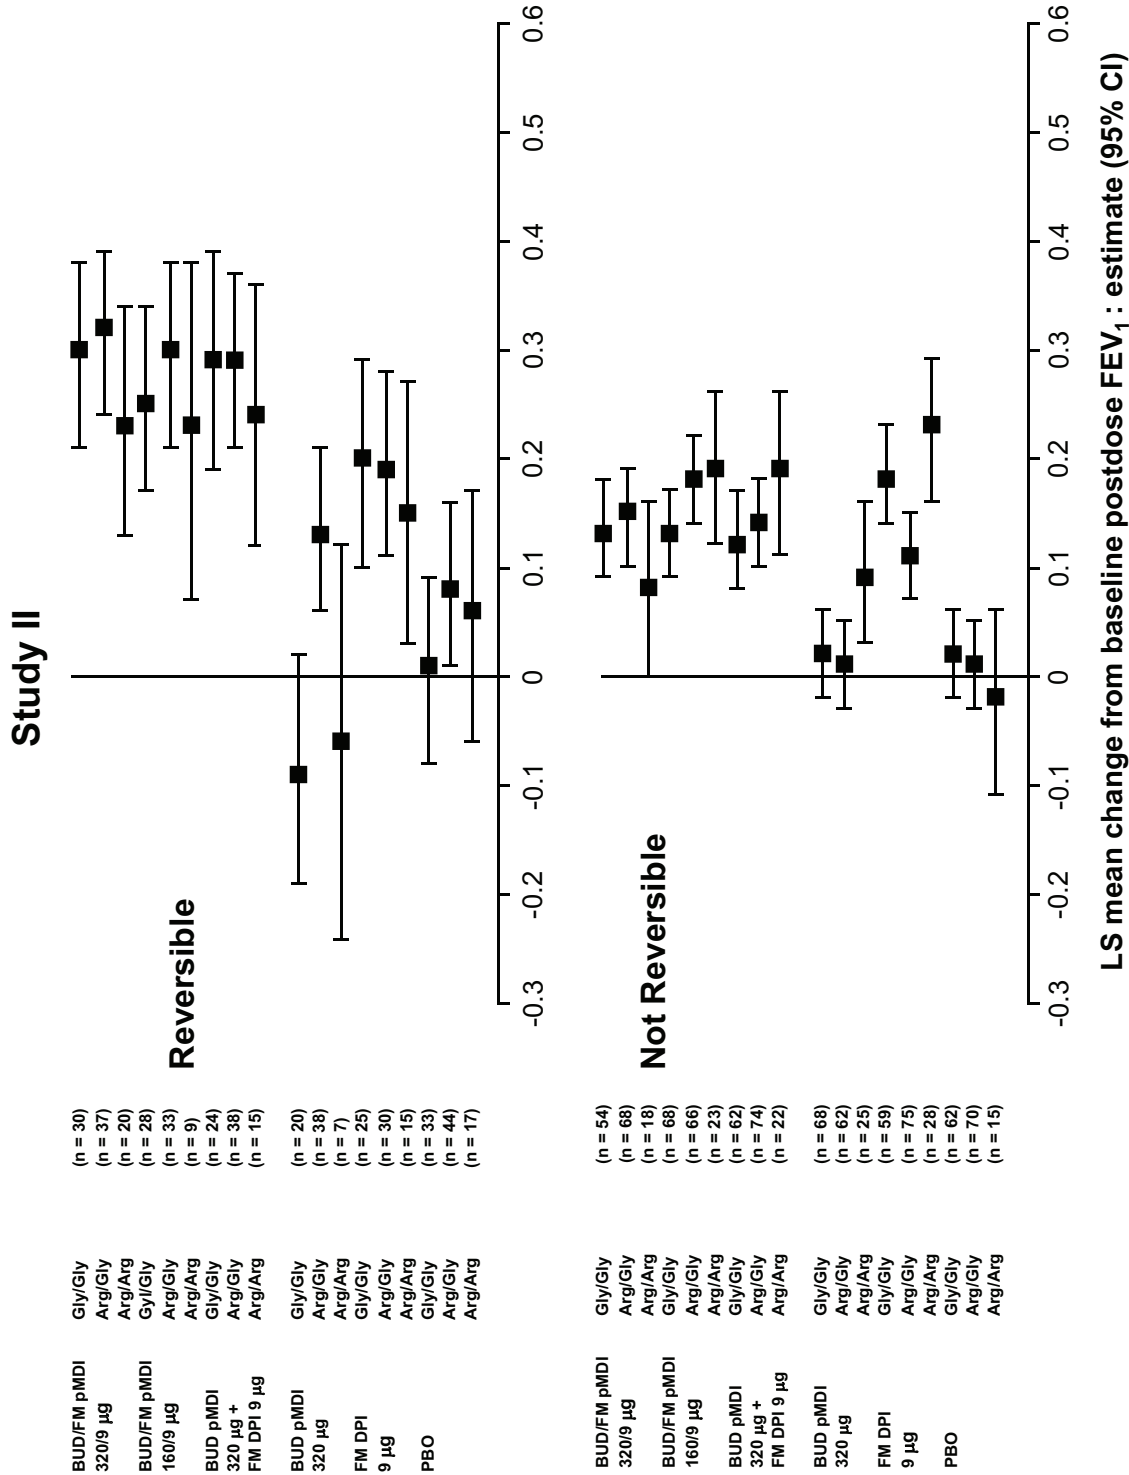

Online supplements are not copyedited prior to posting.
